# Supplementary material for: Molecular Recognition of FDA-Approved Small Molecule Protein Kinase Drugs in Protein Kinases
Source: MDPI journal article supplement (doi:10.3390/molecules27207124), 2022-10-21
Supplement: s1 [file s1]

**Table S1.** List of 30 FDA-approved protein kinase drugs.

| Drug        | Company                 | Inhibitor Type | Year Approved   | Known targets                                          | Disease                                                                                                     |
|-------------|-------------------------|----------------|-----------------|--------------------------------------------------------|-------------------------------------------------------------------------------------------------------------|
| Abemaciclib | Lilly                   | I              | 2017            | CDK4/6                                                 | Breast Ca                                                                                                   |
| Afatinib    | Boehringer Ingelheim    | I              | 2013            | EGFR, ErbB2, ErbB4                                     | NSCLC                                                                                                       |
| Alectinib   | Hoffman-LaRoche         | I              | 2015            | ALK and RET                                            | NSCLC, ALK-positive                                                                                         |
| Axitinib    | Pfizer                  | I              | 2012            | VEGFR1/2/3, PDGFR $\beta$                              | RCC, advanced                                                                                               |
| Bosutinib   | Pfizer                  | I              | 2012            | BCR-Abl, Src, Lyn, and Hck                             | CML                                                                                                         |
| Brigatinib  | Ariad                   | I              | 2017            | ALK, ROS1, IGF-1R, Flt3, EGFR                          | NSCLC, ALK-positive                                                                                         |
| Ceritinib   | Novartis                | I              | 2014            | ALK, IGF-1R, InsR, ROS1                                | NSCLC, ALK-positive after crizotinib resistance                                                             |
| Cobimetinib | Genentech               | III            | 2015            | MEK1/2                                                 | Melanoma with BRAF mutations together with vemurafenib                                                      |
| Crizotinib  | Pfizer                  | I              | 2011            | ALK, MET (HGFR), ROS1, MST1R                           | NSCLC, ALK-positive or ROS1-positive                                                                        |
| Dabrafenib  | GSK                     | I              | 2013            | B-Raf                                                  | Melanoma and NSCLC with BRAF mutations                                                                      |
| Dacomitinib | Pfizer                  | I              | 2018            | EGFR family                                            | EGFR-mutant NSCLC                                                                                           |
| Dasatinib   | Bristol-Myers Squibb    | I              | 2006            | BCR-Abl, Src, Lck, Yes, Fyn, Kit, EphA2, PDGFR $\beta$ | CML                                                                                                         |
| Erlotinib   | Genentech               | I              | 2004            | EGFR                                                   | NSCLC; pancreatic cancer                                                                                    |
| Gefitinib   | Astra Zeneca            | I              | 2003-2005, 2015 | EGFR                                                   | NSCLC                                                                                                       |
| Ibrutinib   | Pharmaceuticals and J&J | I              | 2013            | Bruton tyrosine kinase                                 | Mantle cell lymphoma; CLL; Waldenstrom's macro-globulinemia; marginal zone lymphoma; graft vs. host disease |
| Imatinib    | Novartis                | II             | 2001            | BCR-Abl, Kit, and PDGFR                                | CML and ALL, Ph+; aggressive systemic mastocytosis; CEL; DFSP; HES; GIST; MDS/MDP                           |

**Table S1.** (Continued)

| <b>Drug</b> | <b>Company</b>       | <b>Inhibitor Type</b> | <b>Year Approved</b> | <b>Known targets</b>                                                                       | <b>Disease</b>                                                |
|-------------|----------------------|-----------------------|----------------------|--------------------------------------------------------------------------------------------|---------------------------------------------------------------|
| Lapatinib   | GSK                  | I                     | 2007                 | EGFR, ErbB2                                                                                | Breast cancer                                                 |
| Lenvatinib  | Easai                | I                     | 2015                 | VEGFR1/2/3, PDGFR, FGFR, Kit, RET                                                          | Different-iated thyroid cancer                                |
| Neratinib   | Puma                 | I                     | 2017                 | ErbB2/HER2                                                                                 | HER+ breast cancer                                            |
| Nilotinib   | Novartis             | II                    | 2007                 | BCR-Abl, PDGFR, DDR1                                                                       | CML, Ph+                                                      |
| Nintedanib  | Boehringer Ingelheim | I                     | 2014                 | FGFR1/2/3, PDGFR $\alpha/\beta$ , VEGFR1/2/3, Flt3                                         | Pulmonary fibrosis, idiopathic                                |
| Palbociclib | Park Davis           | II                    | 2015                 | CDK4/6                                                                                     | Breast cancer, ER+ and HER2+                                  |
| Ponatinib   | Ariad                | II                    | 2012                 | BCR-Abl, BCR-Abl T315I, VEGFR, PDGFR, FGFR, EphR, Src family kinases, Kit, RET, Tie2, Flt3 | CML or ALL, Ph+                                               |
| Ribociclib  | Novartis             | I                     | 2017                 | CDK4/6                                                                                     | Breast cancer                                                 |
| Ruxolitinib | Incyte               | I                     | 2011                 | JAK1/2                                                                                     | Myelofibrosis; polycythemia vera                              |
| Sorafenib   | Onyx                 | II                    | 2005                 | VEGFR1/2/3, B-/C-Raf, mutant B-Raf, Kit, Flt3, RET, and PDGFR $\beta$                      | Thyroid cancer, differentiated; hepatocellular carcinoma; RCC |
| Sunitinib   | Pfizer               | I                     | 2006                 | PDGFR $\alpha/\beta$ , VEGFR1/2/3, Kit, Flt3, CSF-1R, and RET                              | RCC; GIST; pancreatic neuroendocrine tumors                   |
| Tofacitinib | Pfizer               | I                     | 2012                 | JAK3                                                                                       | Rheumatoid arthritis                                          |
| Vandetanib  | Astra-Zeneca         | I                     | 2011                 | EGFRs, VEGFRs, RET, Brk, Tie2, EphRs, and Src family kinases                               | Thyroid cancer, medullary                                     |
| Vemurafenib | Genentech            | I                     | 2011                 | A/B/C-Raf and B-Raf (V600E)                                                                | Melanoma with the BRAFV600E mutation                          |
